# Supplementary material for: Marked improvements in glycaemic outcomes following insulin pump therapy initiation in people with type 1 diabetes: a nationwide observational study in Scotland
Source: Springer Nature journal article supplement (doi:10.1007/s00125-021-05413-7), 2021-03-08
Supplement: MOESM1 [file 18940340]

# Supplementary Material for Marked improvements in glycaemic outcomes following insulin pump therapy initiation in people with Type 1 Diabetes - a nationwide observational study in Scotland

A. Jeyam      F.W. Gibb      J.A. McKnight      B. Kennon      J.E. O'Reilly      T.M. Caparrotta  
A. Höhn      S.J. McGurnaghan      L.A.K. Blackburn      S. Hatam      R.J. McKrimmon  
G. Leese      S. Philip      R.S. Lindsay      J. Chalmers      J. Petrie      S.H. Wild      N. Sattar  
P. M. McKeigue      H. M. Colhoun      On behalf of the SDRN Epi Group

## Methods

### Study population

Individuals were censored for the following reasons: end of study (26.6%), end of observability (3.8%), death (0.9%), start of FM/CGM (62.0%), stopping CSII (6.7%).

### Exposure, outcomes and covariates

Diabetic ketoacidosis (DKA) events were defined as any hospital admission or death, involving an ICD10 diagnosis code of E10.1, E11.1, E12.1, E13.1 or E14.1 at any level of the reasons for admission or causes of death.

Severe hypoglycaemic (SHH) events were defined as any hospital admission or death involving an ICD10 diagnosis code of E15, E16.0, E16.1, E16.2 at any level of the reasons for admission or causes of death.

### Statistical Analysis

We modelled the log-transformed  $HbA_{1c}$ , with fixed effects defined as age at CSII initiation, diabetes duration at CSII initiation, sex,  $\log(\text{baseline } HbA_{1c})$ , time (in years and centered on CSII initiation such that CSII starts at time=0) and categorical CSII-exposure time (years, with 0=non-exposed as the reference category); the CSII-exposure time effects estimated by the model are the estimated differences in  $\log(HbA_{1c})$  at the various timepoints, compared to the levels individuals would have had if the within-person pre-intervention trend occurring in  $HbA_{1c}$  had continued post-exposure. The within-individual error-correlation structure was specified as a continuous first-order autoregressive (CAR1) structure to allow for exponentially decayed correlation in measurements the further apart they are in time.

We formally tested the significance of interaction terms using fully adjusted versions of the mixed models described previously. Fixed effects included were: sex, SIMD, diabetes duration, baseline  $HbA_{1c}$ , categorical CSII-time and the interaction term (categorical CSII-time)\*group of interest. Significance of the interaction term was assessed using Likelihood Ratio Tests (LRT) and models were fitted using Maximum Likelihood (ML) for this purpose so as to appropriately compare models with different fixed effects.

In order to crudely evaluate overall trends that might occur in  $HbA_{1c}$  during similar calendar time in non-users and more specifically, the worsening glycaemic control with age among the adolescent subgroup, we used a 1:1 matched non-user sample as control group. For each CSII user from the population under study, we randomly selected an individual matched in age, sex and diabetes duration, who was not using any device (CSII/FM/CGM)

at the CSII user's CSII start date and for at least one year thereafter, and assigning the user's CSII start date as their index date. We described HbA<sub>1c</sub> levels over time in users and non-users, and compared paired levels and differences from baseline in post-index years (i.e. changes as the individuals get older) between users and matched non-users using one sided Wilcoxon signed-rank test adjusted for multiple comparisons.

For DKA, we described crude event-rates in both pre and post-index time for both groups and compared the post vs pre rate ratio in users and non-users.

For the Bayesian Poisson mixed-models, we used a QR reparametrisation for the fixed effects. The reparametrised parameters were given Gaussian priors (mean=0,sd=100). Individual random effects were modelled as standard normal variates shifted by an intercept and scaled by a standard deviation. The prior chosen for the standard deviation of the individual random effects was a half-Cauchy(0,5).

## Results

ESM Table 1: Within-person change from baseline in HbA<sub>1c</sub> (mmol/mol) over time from CSII initiation (years) - overall and stratified by baseline HbA<sub>1c</sub> band - N and median (IQR)

| Time from pump initiation (yrs) | Overall |                    | Baseline HbA <sub>1c</sub> <54 mmol/mol[7.1%] |                 | Baseline HbA <sub>1c</sub> 54-68 mmol/mol[8.4%] |                   | Baseline HbA <sub>1c</sub> 69[8.5%]-74 mmol/mol [8.9%] |                     | Baseline HbA <sub>1c</sub> 75[9.0%]-84 mmol/mol [9.8%] |                      | Baseline HbA <sub>1c</sub> >84 mmol/mol |                       |
|---------------------------------|---------|--------------------|-----------------------------------------------|-----------------|-------------------------------------------------|-------------------|--------------------------------------------------------|---------------------|--------------------------------------------------------|----------------------|-----------------------------------------|-----------------------|
|                                 | N       | Med. (IQR)         | N                                             | Med. (IQR)      | N                                               | Med. (IQR)        | N                                                      | Med. (IQR)          | N                                                      | Med. (IQR)           | N                                       | Med. (IQR)            |
| 4-5 yrs bef.                    | 2953    | 1.5 (-5.5,9.0)     | 264                                           | 5.5 (0.0,12.2)  | 1278                                            | 3.0 (-3.5,9.0)    | 516                                                    | 1.0 (-5.5,9.0)      | 500                                                    | -2.0 (-9.0,7.0)      | 368                                     | -4.5 (-14.5,7.0)      |
| 3-4 yrs bef.                    | 3218    | 1.0 (-5.0,8.0)     | 298                                           | 3.0 (-1.0,9.5)  | 1400                                            | 2.0 (-3.0,8.0)    | 559                                                    | 1.0 (-5.0,8.0)      | 544                                                    | -1.0 (-7.5,7.5)      | 385                                     | -5.0 (-14.0,5.0)      |
| 2-3 yrs bef.                    | 3547    | 1.0 (-4.0,7.0)     | 348                                           | 3.0 (-1.0,10.0) | 1580                                            | 2.0 (-2.5,7.0)    | 603                                                    | 0.0 (-4.5,6.1)      | 574                                                    | 0.5 (-5.0,7.0)       | 404                                     | -2.5 (-11.5,7.5)      |
| 1-2 yrs bef.                    | 4081    | ref.               | 459                                           | ref.            | 1895                                            | ref.              | 661                                                    | ref.                | 613                                                    | ref.                 | 418                                     | ref.                  |
| 0-1 yr bef.                     | 4592    | ref.               | 529                                           | ref.            | 2116                                            | ref.              | 713                                                    | ref.                | 673                                                    | ref.                 | 473                                     | ref.                  |
| 0-1 yr aft.                     | 4602    | -5.5 (-12.0,0.0)** | 528                                           | 1.0 (-2.5,5.0)  | 2103                                            | -3.5 (-8.0,1.0)** | 711                                                    | -8.5 (-13.0,-2.0)** | 672                                                    | -12.0 (-18.0,-6.0)** | 468                                     | -21.0 (-30.0,-11.0)** |
| 1-2 yrs aft.                    | 3904    | -5.0 (-12.0,1.0)** | 425                                           | 1.5 (-2.0,7.0)  | 1760                                            | -3.0 (-8.0,2.0)** | 609                                                    | -7.5 (-13.5,-1.5)** | 591                                                    | -11.5 (-18.0,-5.0)** | 395                                     | -19.5 (-30.0,-8.8)**  |
| 2-3 yrs aft.                    | 3198    | -5.0 (-12.0,2.0)** | 317                                           | 2.5 (-2.5,8.0)  | 1395                                            | -3.0 (-7.5,3.0)** | 521                                                    | -8.0 (-13.8,-1.9)** | 504                                                    | -11.0 (-18.0,-3.0)** | 336                                     | -18.5 (-27.5,-6.5)**  |
| 3-4 yrs aft.                    | 2668    | -4.5 (-12.0,2.0)** | 242                                           | 3.0 (-1.5,10.0) | 1142                                            | -2.5 (-7.5,3.0)** | 441                                                    | -7.5 (-13.0,-1.0)** | 431                                                    | -11.0 (-18.0,-2.0)** | 293                                     | -18.2 (-27.6,-5.0)**  |
| 4-5 yrs aft.                    | 2068    | -5.0 (-13.0,2.0)** | 169                                           | 4.0 (-0.5,10.0) | 850                                             | -2.0 (-8.0,3.0)** | 356                                                    | -8.0 (-13.0,-1.5)** | 345                                                    | -10.5 (-18.0,-4.9)** | 236                                     | -18.8 (-30.0,-6.0)**  |
| 5+ yrs aft.                     | 1392    | -5.0 (-12.5,2.8)** | 120                                           | 2.5 (-2.5,8.4)  | 572                                             | -2.0 (-8.0,5.0)** | 237                                                    | -7.0 (-12.8,0.5)**  | 220                                                    | -10.5 (-18.5,-3.0)** | 151                                     | -19.0 (-27.6,-6.5)**  |

Note:

For post-exposure years significance of one-sided Wilcoxon signed-rank test p adjusted for multiple comparisons is denoted by \*\* (p<0.01) or \* (0.01 ≤ p<0.05)

ESM Table 2: Within-person change from baseline in HbA<sub>1c</sub> (mmol/mol) over time from CSII initiation (years), stratified by sex - N and median (IQR) - For post-exposure years significance of one-sided Wilcoxon signed-rank test p adjusted for multiple comparisons is denoted by \*\* (p<0.01) or \* ( 0.01 ≤ p<0.05)

| Time from CSII initiation (yrs) | Female |                     | Male |                    |
|---------------------------------|--------|---------------------|------|--------------------|
|                                 | N      | Med. (IQR)          | N    | Med. (IQR)         |
| 4-5 yrs bef.                    | 1811   | 1.5 (-5.5,10.0)     | 1142 | 1.0 (-4.9,7.5)     |
| 3-4 yrs bef.                    | 1968   | 1.0 (-5.0,8.5)      | 1250 | 1.0 (-4.5,7.5)     |
| 2-3 yrs bef.                    | 2139   | 1.5 (-4.0,7.5)      | 1408 | 1.0 (-3.5,6.5)     |
| 1-2 yrs bef.                    | 2409   | ref.                | 1672 | ref.               |
| 0-1 yr bef.                     | 2695   | ref.                | 1897 | ref.               |
| 0-1 yr aft.                     | 2702   | -6.0 (-13.0,-0.5)** | 1900 | -4.5 (-10.5,0.5)** |
| 1-2 yrs aft.                    | 2296   | -5.5 (-13.5,1.0)**  | 1608 | -4.5 (-10.5,1.0)** |
| 2-3 yrs aft.                    | 1901   | -5.5 (-13.0,2.0)**  | 1297 | -4.0 (-10.5,2.0)** |
| 3-4 yrs aft.                    | 1603   | -5.0 (-12.5,2.0)**  | 1065 | -4.0 (-11.0,2.1)** |
| 4-5 yrs aft.                    | 1251   | -5.2 (-13.0,2.0)**  | 817  | -5.0 (-12.0,1.0)** |
| 5+ yrs aft.                     | 829    | -5.0 (-13.0,2.0)**  | 563  | -4.5 (-12.0,3.5)** |

ESM Table 3: Modelled estimates (95% CI) of the yearly fold-change in HbA<sub>1c</sub> in the pre-package time-period (2 years prior to CSII initiation and earlier), and of the fold-change in HbA<sub>1c</sub> following CSII initiation, compared to pre-package levels - overall and stratified by sex - adjusting for age, diabetes duration at CSII initiation and HbA<sub>1c</sub> at baseline -

| Variable               | Female            | Male              |
|------------------------|-------------------|-------------------|
| Time effect (years)    | 1.00 (0.99; 1.00) | 0.99 (0.99; 1.00) |
| CSII exposure time     |                   |                   |
| ref= No CSII usage     |                   |                   |
| 0-1 year               | 0.87 (0.86; 0.88) | 0.91 (0.89; 0.92) |
| 1-2 years              | 0.89 (0.87; 0.90) | 0.92 (0.90; 0.94) |
| 2-3 years              | 0.90 (0.88; 0.92) | 0.94 (0.91; 0.96) |
| 3-4 years              | 0.91 (0.89; 0.94) | 0.95 (0.92; 0.97) |
| 4-5 years              | 0.92 (0.89; 0.94) | 0.95 (0.91; 0.98) |
| 5 or more years        | 0.93 (0.89; 0.96) | 0.96 (0.93; 1.00) |
| Number of observations | 14022             | 9487              |
| Number of individuals  | 2386              | 1713              |

ESM Table 4: Within-person change from baseline in HbA<sub>1c</sub> (mmol/mol) over time from CSII initiation (years), stratified by age band at CSII initiation - N and median (IQR)

| Time from pump initiation (yrs) | Age <13 y.o. |                    | Age 13-18 y.o. |                    | Age 19-24 y.o. |                    | Age 25-44 y.o. |                     | Age 45-64 y.o. |                     | Age >64 y.o. |                     |
|---------------------------------|--------------|--------------------|----------------|--------------------|----------------|--------------------|----------------|---------------------|----------------|---------------------|--------------|---------------------|
|                                 | N            | Med. (IQR)         | N              | Med. (IQR)         | N              | Med. (IQR)         | N              | Med. (IQR)          | N              | Med. (IQR)          | N            | Med. (IQR)          |
| 4-5 yrs bef.                    | 212          | 4.0 (-3.0,9.0)     | 302            | 0.0 (-7.5,7.5)     | 248            | 4.0 (-5.5,14.8)    | 1401           | 2.0 (-5.6,10.5)     | 733            | 0.5 (-5.0,6.5)      | 57           | 3.0 (-3.8,6.2)      |
| 3-4 yrs bef.                    | 314          | 2.5 (-2.5,8.5)     | 352            | 0.0 (-7.0,6.6)     | 267            | 2.5 (-4.0,13.0)    | 1463           | 1.0 (-5.0,9.0)      | 764            | 0.5 (-4.0,6.0)      | 58           | 0.0 (-5.0,4.9)      |
| 2-3 yrs bef.                    | 487          | 2.0 (-3.0,8.4)     | 420            | 0.0 (-5.0,7.0)     | 281            | 2.7 (-3.0,9.5)     | 1516           | 1.5 (-4.0,8.0)      | 784            | 0.5 (-3.5,5.0)      | 59           | 0.5 (-2.0,4.8)      |
| 1-2 yrs bef.                    | 862          | ref.               | 500            | ref.               | 303            | ref.               | 1553           | ref.                | 802            | ref.                | 61           | ref.                |
| 0-1 yr bef.                     | 1203         | ref.               | 552            | ref.               | 321            | ref.               | 1624           | ref.                | 828            | ref.                | 64           | ref.                |
| 0-1 yr aft.                     | 1205         | -4.5 (-10.0,0.0)** | 559            | -3.5 (-10.0,2.0)** | 323            | -8.0 (-16.6,1.0)** | 1624           | -7.0 (-13.5,-1.0)** | 827            | -5.0 (-11.5,0.0)**  | 64           | -6.0 (-10.8,-1.0)** |
| 1-2 yrs aft.                    | 980          | -3.5 (-9.0,2.0)**  | 506            | -0.5 (-8.5,7.0)    | 274            | -7.0 (-15.6,0.5)** | 1397           | -7.0 (-14.0,-0.5)** | 698            | -6.0 (-12.5,-0.5)** | 49           | -8.0 (-15.0,-1.0)** |
| 2-3 yrs aft.                    | 756          | -3.0 (-10.0,3.0)** | 437            | 0.0 (-8.4,8.0)     | 227            | -7.5 (-16.0,2.0)** | 1162           | -6.0 (-14.0,0.0)**  | 579            | -5.5 (-11.5,-0.6)** | 37           | -6.5 (-14.0,-1.5)** |
| 3-4 yrs aft.                    | 614          | -3.4 (-9.4,3.0)**  | 380            | 0.0 (-8.0,9.0)     | 185            | -5.5 (-16.6,3.9)** | 962            | -6.0 (-14.5,1.0)**  | 495            | -6.0 (-12.0,-1.0)** | 32           | -7.0 (-16.0,0.5)*   |
| 4-5 yrs aft.                    | 458          | -4.0 (-10.6,3.0)** | 305            | -0.5 (-9.0,10.0)   | 137            | -8.0 (-17.8,0.5)** | 741            | -7.0 (-14.5,1.0)**  | 404            | -5.0 (-12.0,-0.5)** | 23           | -7.8 (-15.8,-1.8)   |
| 5+ yrs aft.                     | 305          | -3.0 (-10.0,7.0)** | 218            | -2.0 (-11.0,9.0)   | 91             | -7.0 (-17.0,2.1)** | 498            | -5.5 (-13.0,2.0)**  | 268            | -6.0 (-14.0,0.0)**  | 12           | -3.0 (-10.0,3.0)    |

Note:

For post-exposure years, significance of one-sided Wilcoxon signed-rank test p adjusted for multiple comparisons is denoted by \*\* (p<0.01) or \* (0.01 ≤ p<0.05)

ESM Table 5: Modelled estimates (95% CI) of the yearly fold-change in HbA<sub>1c</sub> in the pre-package time-period (2 years prior to CSII initiation and earlier), and of the fold-change in HbA<sub>1c</sub> following CSII initiation compared to the pre-package years -stratified by age band at pump initiation, adjusting by age, sex, diabetes duration and HbA<sub>1c</sub> at baseline

| Variable                                 | <13 y.o.           | 13-18 y.o.        | 19-24 y.o.         | 25-44 y.o.        | 45-64 y.o.        | >64 y.o.          |
|------------------------------------------|--------------------|-------------------|--------------------|-------------------|-------------------|-------------------|
| Time effect (years)                      | 0.99 ( 0.98; 0.99) | 1.00 (0.99; 1.01) | 1.00 ( 0.99; 1.01) | 1.00 (0.99; 1.00) | 1.00 (0.99; 1.00) | 1.00 (0.99; 1.02) |
| CSII exposure time<br>ref= No CSII usage |                    |                   |                    |                   |                   |                   |
| 0-1 year                                 | 0.90 ( 0.88; 0.93) | 0.93 (0.89; 0.96) | 0.83 ( 0.79; 0.87) | 0.87 (0.85; 0.89) | 0.90 (0.88; 0.92) | 0.89 (0.84; 0.94) |
| 1-2 years                                | 0.94 ( 0.91; 0.97) | 0.98 (0.93; 1.02) | 0.85 ( 0.80; 0.91) | 0.87 (0.85; 0.89) | 0.90 (0.87; 0.92) | 0.88 (0.81; 0.95) |
| 2-3 years                                | 0.96 ( 0.92; 1.00) | 1.00 (0.95; 1.06) | 0.86 ( 0.80; 0.93) | 0.88 (0.86; 0.91) | 0.90 (0.88; 0.93) | 0.87 (0.79; 0.95) |
| 3-4 years                                | 0.98 ( 0.93; 1.03) | 1.03 (0.96; 1.10) | 0.87 ( 0.79; 0.95) | 0.90 (0.87; 0.92) | 0.90 (0.87; 0.93) | 0.86 (0.78; 0.96) |
| 4-5 years                                | 1.00 ( 0.94; 1.06) | 1.03 (0.95; 1.11) | 0.85 ( 0.76; 0.94) | 0.90 (0.86; 0.93) | 0.91 (0.87; 0.94) | 0.84 (0.74; 0.95) |
| 5 or more years                          | 1.05 ( 0.98; 1.12) | 1.05 (0.96; 1.15) | 0.83 ( 0.74; 0.94) | 0.91 (0.87; 0.94) | 0.90 (0.86; 0.95) | 0.83 (0.72; 0.96) |
| Number of observations                   | 4826               | 2947              | 1540               | 8867              | 4966              | 363               |
| Number of individuals                    | 1100               | 512               | 275                | 1413              | 742               | 57                |

ESM Table 6: Within-person change from baseline in HbA<sub>1c</sub> (mmol/mol), over time from CSII initiation (years), stratified by SIMD quintile - N and median (IQR)

| Time from pump initiation (yrs) | SIMD Q1 (most deprived) |                    | Q2  |                    | Q3  |                    | Q4  |                    | Q5 (least deprived) |                    |
|---------------------------------|-------------------------|--------------------|-----|--------------------|-----|--------------------|-----|--------------------|---------------------|--------------------|
|                                 | N                       | Med. (IQR)         | N   | Med. (IQR)         | N   | Med. (IQR)         | N   | Med. (IQR)         | N                   | Med. (IQR)         |
| 4-5 yrs bef.                    | 376                     | 2.0 (-6.2,9.8)     | 497 | 1.0 (-6.0,9.0)     | 558 | 2.0 (-5.0,10.5)    | 559 | 2.0 (-4.1,8.0)     | 641                 | 0.5 (-5.0,7.5)     |
| 3-4 yrs bef.                    | 407                     | 1.0 (-5.0,9.5)     | 551 | 2.5 (-5.0,9.5)     | 630 | 1.0 (-5.0,8.0)     | 608 | 0.0 (-5.0,7.0)     | 694                 | 0.8 (-4.5,6.0)     |
| 2-3 yrs bef.                    | 443                     | 2.0 (-4.0,8.5)     | 619 | 2.0 (-3.5,8.8)     | 689 | 2.0 (-3.0,7.5)     | 686 | 0.5 (-4.0,6.0)     | 769                 | 0.0 (-4.0,5.5)     |
| 1-2 yrs bef.                    | 527                     | ref.               | 700 | ref.               | 809 | ref.               | 803 | ref.               | 886                 | ref.               |
| 0-1 yr bef.                     | 604                     | ref.               | 774 | ref.               | 906 | ref.               | 930 | ref.               | 1010                | ref.               |
| 0-1 yr aft.                     | 605                     | -5.5 (-12.5,0.0)** | 773 | -5.5 (-12.5,0.2)** | 911 | -5.5 (-12.0,0.0)** | 934 | -5.0 (-11.0,0.0)** | 1014                | -5.0 (-11.0,0.0)** |
| 1-2 yrs aft.                    | 494                     | -5.5 (-13.0,1.7)** | 645 | -4.0 (-12.0,1.5)** | 769 | -4.5 (-12.0,1.0)** | 808 | -5.0 (-12.0,0.6)** | 871                 | -5.0 (-11.0,1.0)** |
| 2-3 yrs aft.                    | 396                     | -4.2 (-11.0,3.6)** | 512 | -4.5 (-11.5,2.5)** | 623 | -4.5 (-12.0,1.8)** | 660 | -5.0 (-11.5,1.5)** | 723                 | -4.0 (-11.0,2.0)** |
| 3-4 yrs aft.                    | 340                     | -4.0 (-11.5,3.5)** | 429 | -4.5 (-12.0,2.5)** | 518 | -4.0 (-12.0,2.5)** | 534 | -4.0 (-11.5,1.9)** | 600                 | -5.0 (-10.5,1.5)** |
| 4-5 yrs aft.                    | 271                     | -3.0 (-11.0,3.0)** | 339 | -5.2 (-12.0,2.5)** | 409 | -5.0 (-12.0,3.0)** | 404 | -5.5 (-12.5,1.0)** | 442                 | -4.0 (-12.1,2.0)** |
| 5+ yrs aft.                     | 177                     | -5.5 (-12.5,1.0)** | 211 | -5.0 (-12.0,3.0)** | 264 | -4.0 (-13.0,4.0)** | 286 | -4.5 (-13.0,2.0)** | 312                 | -3.5 (-11.8,4.0)** |

*Note:*

For post-exposure years, significance of one-sided Wilcoxon signed-rank test p adjusted for multiple comparisons is denoted by \*\* (p<0.01) or \* ( 0.01 ≤ p<0.05)

ESM Table 7: Within-person change from baseline in HbA<sub>1c</sub> (mmol/mol), over time from CSII initiation (years), stratified by prior FM/CGM usage - N and median (IQR)

| Time from pump initiation (yrs) | No prior FM/CGM use |                    | Prior FM/CGM use |                     |
|---------------------------------|---------------------|--------------------|------------------|---------------------|
|                                 | N                   | Med. (IQR)         | N                | Med. (IQR)          |
| 4-5 yrs bef.                    | 2723                | 1.0 (-5.5,8.5)     | 230              | 3.5 (-2.5,12.0)     |
| 3-4 yrs bef.                    | 2967                | 1.0 (-5.0,7.5)     | 251              | 4.0 (-1.5,11.9)     |
| 2-3 yrs bef.                    | 3266                | 1.0 (-4.0,7.0)     | 281              | 3.5 (-1.0,10.0)     |
| 1-2 yrs bef.                    | 3742                | ref.               | 339              | ref.                |
| 0-1 yr bef.                     | 4203                | ref.               | 389              | ref.                |
| 0-1 yr aft.                     | 4213                | -5.5 (-12.0,0.0)** | 389              | -6.0 (-11.0,0.0)**  |
| 1-2 yrs aft.                    | 3684                | -5.0 (-12.0,1.0)** | 220              | -6.0 (-12.8,1.0)**  |
| 2-3 yrs aft.                    | 3144                | -5.0 (-12.0,2.0)** | 54               | -9.0 (-14.0,1.0)**  |
| 3-4 yrs aft.                    | 2653                | -4.5 (-12.0,2.0)** | 15               | -6.0 (-18.1,-4.5)** |
| 4-5 yrs aft.                    | 2065                | -5.0 (-13.0,2.0)** | <10              | -                   |
| 5+ yrs aft.                     | 1390                | -5.0 (-12.5,2.8)** | <10              | -                   |

*Note:*

For post-exposure years, significance of one-sided Wilcoxon signed-rank test p adjusted for multiple comparisons is denoted by \*\* (p<0.01) or \* ( 0.01 ≤ p<0.05)

ESM Table 8: Modelled estimates (95% CI) of the yearly fold-change in HbA<sub>1c</sub> in the pre-package time-period (2 years prior to CSII initiation and earlier), and of the fold-change in HbA<sub>1c</sub> following CSII initiation, compared to pre-package levels - overall and stratified by prior FM/CGM use - adjusting for age, sex, diabetes duration and HbA<sub>1c</sub> at baseline -

| Variable                                 | No prior FM/CGM use | Prior FM/CGM use  |
|------------------------------------------|---------------------|-------------------|
| Time effect (years)                      | 1.00 (0.99; 1.00)   | 0.99 (0.98; 1.00) |
| CSII exposure time<br>ref= No CSII usage |                     |                   |
| 0-1 year                                 | 0.89 (0.88; 0.90)   | 0.85 (0.81; 0.89) |
| 1-2 years                                | 0.90 (0.89; 0.92)   | 0.86 (0.81; 0.91) |
| 2-3 years                                | 0.92 (0.90; 0.93)   | 0.87 (0.80; 0.94) |
| 3-4 years                                | 0.93 (0.91; 0.95)   | 0.88 (0.79; 0.99) |
| 4-5 years                                | 0.93 (0.91; 0.95)   | 0.95 (0.77; 1.19) |
| 5 or more years                          | 0.94 (0.92; 0.97)   | 0.99 (0.78; 1.27) |
| Number of observations                   | 22273               | 1236              |
| Number of individuals                    | 3728                | 371               |

ESM Table 9: DKA and SHH - Crude event-rates and associated 95% Confidence Intervals, by time from CSII initiation (years) - DKA and SHH - (E denotes the number of events observed and PY the number of person-years observed)

| Time from CSII initiation (years) | SHH |        |                      | DKA |        |                      |
|-----------------------------------|-----|--------|----------------------|-----|--------|----------------------|
|                                   | E   | PY     | Rate (95% CI)        | E   | PY     | Rate (95% CI)        |
| 4-5 yrs bef.                      | 55  | 2853.9 | 19.3 ( 14.5 ; 25.1 ) | 177 | 2853.9 | 62.0 ( 53.2 ; 71.9 ) |
| 3-4 yrs bef.                      | 68  | 3086.4 | 22.0 ( 17.1 ; 27.9 ) | 204 | 3086.4 | 66.1 ( 57.3 ; 75.8 ) |
| 2-3 yrs bef.                      | 76  | 3372.7 | 22.5 ( 17.8 ; 28.2 ) | 256 | 3372.7 | 75.9 ( 66.9 ; 85.8 ) |
| 1-2 yrs bef.                      | 108 | 3804.2 | 28.4 ( 23.3 ; 34.3 ) | 270 | 3804.2 | 71.0 ( 62.8 ; 80.0 ) |
| 0-1 yr bef.                       | 144 | 4365.0 | 33.0 ( 27.8 ; 38.8 ) | 280 | 4365.0 | 64.1 ( 56.9 ; 72.1 ) |
| 0-1 yr aft.                       | 87  | 4089.0 | 21.3 ( 17.0 ; 26.2 ) | 221 | 4089.0 | 54.0 ( 47.2 ; 61.7 ) |
| 1-2 yrs aft.                      | 56  | 3370.8 | 16.6 ( 12.5 ; 21.6 ) | 175 | 3370.8 | 51.9 ( 44.5 ; 60.2 ) |
| 2-3 yrs aft.                      | 54  | 2834.7 | 19.0 ( 14.3 ; 24.9 ) | 117 | 2834.7 | 41.3 ( 34.1 ; 49.5 ) |
| 3-4 yrs aft.                      | 37  | 2292.5 | 16.1 ( 11.4 ; 22.2 ) | 132 | 2292.5 | 57.6 ( 48.2 ; 68.3 ) |
| 4-5 yrs aft.                      | 20  | 1607.1 | 12.4 ( 7.6 ; 19.2 )  | 80  | 1607.1 | 49.8 ( 39.5 ; 62.0 ) |
| 5+ yrs aft.                       | 42  | 2483.3 | 16.9 ( 12.2 ; 22.9 ) | 102 | 2483.3 | 41.1 ( 33.5 ; 49.9 ) |

ESM Table 10: Estimated Rate Ratios of DKA admissions for CSII-exposed person-time vs pre-package person-time and for pre-package trend from models adjusted for age, sex, diabetes duration and baseline HbA1c - Posterior mean (95% Credible Interval) and posterior probability of the direction of the effect (pp)

| Variable                               | Rate Ratios - Posterior mean (95% Credible Interval) | pp   |
|----------------------------------------|------------------------------------------------------|------|
| Time effect (years)                    | 1.03 ( 0.99 ; 1.07 )                                 | 0.95 |
| Pump-exposure status<br>ref= Unexposed |                                                      |      |
| Exposed                                | 0.61 ( 0.47 ; 0.77 )                                 | 1.00 |

ESM Table 11: Crude DKA event-rates and associated 95% Confidence Intervals by CSII exposure status - Stratified by baseline HbA<sub>1c</sub> bands - (E denotes the number of events observed and PY the number of person-years observed) -

| CSII Exposure status | E PY  Crude event rate (95% CI)    |                                     |                                     |                                      |                                        |
|----------------------|------------------------------------|-------------------------------------|-------------------------------------|--------------------------------------|----------------------------------------|
|                      | <54 mmol/mol[7.1%]                 | 54-68[8.4%] mmol/mol                | 69[8.5%]-74[8.9%] mmol/mol          | 75[9.0%]-84[9.8%] mmol/mol           | >84 mmol/mol                           |
| No exposure          | 42   1749.7   24.0 ( 17.3 ; 32.4 ) | 320   7825.7   40.9 ( 36.5 ; 45.6 ) | 145   2942.6   49.3 ( 41.6 ; 58.0 ) | 269   2800.9   96.0 ( 84.9 ; 108.2 ) | 400   1985.0   201.5 ( 182.2 ; 222.3 ) |
| Exposed              | 43   1601.5   26.8 ( 19.4 ; 36.2 ) | 200   7143.1   28.0 ( 24.3 ; 32.2 ) | 137   2706.7   50.6 ( 42.5 ; 59.8 ) | 185   2677.7   69.1 ( 59.5 ; 79.8 )  | 239   1777.3   134.5 ( 118.0 ; 152.6 ) |



ESM Table 12: Estimated Rate Ratios of DKA admissions for CSII-exposed person-time vs pre-package person-time and for pre-package trend from models adjusted for age, sex and diabetes duration - stratified by baseline HbA<sub>1c</sub> band - Posterior mean (95% Credible Interval) and posterior probability of the direction of the effect (pp)

| CSII Exposure status                   | <54 mmol/mol [7.1\%] |      | 54-68 mmol/mol [8.4\%] |      | 69[8.5\%]-74[8.9\%] mmol/mol |      | 75[9.0\%]-84[9.8\%] mmol/mol |      | >84 mmol/mol         |      |
|----------------------------------------|----------------------|------|------------------------|------|------------------------------|------|------------------------------|------|----------------------|------|
|                                        | PM (95% CrI)         | pp   | PM (95% CrI)           | pp   | PM (95% CrI)                 | pp   | PM (95% CrI)                 | pp   | PM (95% CrI)         | pp   |
| Time effect (years)                    | 1.27 ( 1.09 ; 1.47 ) | 1.00 | 1.03 ( 0.95 ; 1.10 )   | 0.78 | 1.03 ( 0.94 ; 1.13 )         | 0.76 | 0.94 ( 0.86 ; 1.02 )         | 0.93 | 1.06 ( 0.99 ; 1.14 ) | 0.95 |
| Pump-exposure status<br>ref= Unexposed |                      |      |                        |      |                              |      |                              |      |                      |      |
| Exposed                                | 0.23 ( 0.07 ; 0.74 ) | 0.99 | 0.51 ( 0.32 ; 0.83 )   | 1.00 | 0.73 ( 0.38 ; 1.35 )         | 0.85 | 1.16 ( 0.65 ; 2.01 )         | 0.69 | 0.51 ( 0.32 ; 0.80 ) | 1.00 |

ESM Table 13: Crude DKA event-rates and associated 95% Confidence Intervals by CSII exposure status - Stratified by sex - (E denotes the number of events observed and PY the number of person-years observed) -

| Pump Exposure status | E PY  Crude event rate (95% CI) |         |                      |      |        |                      |
|----------------------|---------------------------------|---------|----------------------|------|--------|----------------------|
|                      | Female                          |         |                      | Male |        |                      |
| No exposure          | 848                             | 10534.1 | 80.5 ( 75.2 ; 86.1 ) | 339  | 6948.1 | 48.8 ( 43.7 ; 54.3 ) |
| Exposed              | 602                             | 9996.2  | 60.2 ( 55.5 ; 65.2 ) | 225  | 6681.2 | 33.7 ( 29.4 ; 38.4 ) |

ESM Table 14: Estimated Rate Ratios of DKA admissions for CSII-exposed person-time vs pre-package person-time and for pre-package trend from models adjusted for age, sex, diabetes duration and HbA<sub>1c</sub> at baseline - stratified by sex - Posterior mean (95% Credible Interval) and posterior probability of the direction of the effect (pp)-

| CSII Exposure status                   | Female               |      | Male                 |      |
|----------------------------------------|----------------------|------|----------------------|------|
|                                        | PM (95% CrI)         | pp   | PM (95% CrI)         | pp   |
| Time effect (years)                    | 1.03 ( 0.99 ; 1.08 ) | 0.91 | 1.03 ( 0.96 ; 1.11 ) | 0.84 |
| Pump-exposure status<br>ref= Unexposed |                      |      |                      |      |
| Exposed                                | 0.63 ( 0.47 ; 0.84 ) | 1.00 | 0.53 ( 0.33 ; 0.86 ) | 0.99 |

ESM Table 15: Crude DKA event-rates and associated 95% Confidence Intervals by CSII exposure status - Stratified by age band at pump initiation - (E denotes the number of events observed and PY the number of person-years observed)

| Pump Exposure status | E PY  Crude event rate (95% CI) |                                |                                 |                              |                              |          |
|----------------------|---------------------------------|--------------------------------|---------------------------------|------------------------------|------------------------------|----------|
|                      | <13 y.o.                        | 13-18 y.o.                     | 19-24 y.o.                      | 25-44 y.o.                   | 45-64 y.o.                   | >64 y.o. |
| No exposure          | 254 2542.8 99.9 (88.0; 113.0)   | 140 1984.7 70.5 (59.3; 83.2)   | 344 1380.7 249.1 (223.5; 276.9) | 372 7428.4 50.1 (45.1; 55.4) | 74 3852.2 19.2 (15.1; 24.1)  | E<10     |
| Exposed              | 132 3871.0 34.1 (28.5; 40.4)    | 223 2211.8 100.8 (88.0; 115.0) | 117 1123.1 104.2 (86.2; 124.8)  | 246 6064.5 40.6 (35.7; 46.0) | 100 3203.4 31.2 (25.4; 38.0) | E<10     |

ESM Table 16: Estimated Rate Ratios of DKA admissions for CSII-exposed person-time vs pre-package person-time and for pre-package trend from models adjusted for age, sex, diabetes duration and HbA<sub>1c</sub> at baseline - stratified by age-band at pump initiation Posterior mean (95% Credible Interval) and posterior probability of the direction of the effect (pp))

| CSII Exposure status                | <13 y.o.             |      | 13-18 y.o.           |      | 19-24 y.o.           |      | 25-44 y.o.           |      | 45-64 y.o.           |      | >64 y.o.        |    |
|-------------------------------------|----------------------|------|----------------------|------|----------------------|------|----------------------|------|----------------------|------|-----------------|----|
|                                     | PM (95% CrI)         | pp   | PM (95% CrI)         | pp   | PM (95% CrI)         | pp   | PM (95% CrI)         | pp   | PM (95% CrI)         | pp   | PM (95% CrI)    | pp |
| Time effect (years)                 | 1.03 ( 0.94 ; 1.13 ) | 0.77 | 1.08 ( 0.99 ; 1.18 ) | 0.95 | 0.99 ( 0.89 ; 1.10 ) | 0.61 | 1.02 ( 0.96 ; 1.09 ) | 0.74 | 1.03 ( 0.94 ; 1.12 ) | 0.70 | Low sample size | -  |
| Pump-exposure status ref= Unexposed |                      |      |                      |      |                      |      |                      |      |                      |      | -               | -  |
| Exposed                             | 0.23 ( 0.12 ; 0.44 ) | 1.00 | 1.05 ( 0.59 ; 1.89 ) | 0.57 | 0.45 ( 0.23 ; 0.85 ) | 0.99 | 0.63 ( 0.41 ; 0.96 ) | 0.99 | 1.50 ( 0.75 ; 3.05 ) | 0.87 | -               | -  |

ESM Table 17: Crude DKA event-rates and associated 95% Confidence Intervals by pump exposure status - Stratified by SIMD quintile - (E denotes the number of events observed and PY the number of person-years observed)

| CSII Exposure status | E PY  Crude event rate (95% CI)        |                                     |                                     |                                     |                                     |
|----------------------|----------------------------------------|-------------------------------------|-------------------------------------|-------------------------------------|-------------------------------------|
|                      | Q1 (most deprived).                    | Q2                                  | Q3                                  | Q4                                  | Q5 (least deprived)                 |
| No exposure          | 285   2229.0   127.9 ( 113.4 ; 143.6 ) | 244   2987.9   81.7 ( 71.7 ; 92.6 ) | 248   3390.5   73.1 ( 64.3 ; 82.8 ) | 164   3381.8   48.5 ( 41.4 ; 56.5 ) | 158   3803.5   41.5 ( 35.3 ; 48.5 ) |
| Exposed              | 224   2074.0   108.0 ( 94.3 ; 123.1 )  | 180   2596.1   69.3 ( 59.6 ; 80.2 ) | 138   3302.3   41.8 ( 35.1 ; 49.4 ) | 113   3383.0   33.4 ( 27.5 ; 40.2 ) | 107   3758.3   28.5 ( 23.3 ; 34.4 ) |

ESM Table 18: Estimated Rate Ratios of DKA admissions for CSII-exposed person-time vs pre-package person-time and for pre-package trend from models adjusted for age, sex, diabetes duration and HbA<sub>1c</sub> at baseline - stratified by SIMD Quintile - Posterior mean (95% Credible Interval) and posterior probability of the direction of the effect (pp)

| Pump Exposure status                | Q1 (most deprived)   |      | Q2                   |      | Q3                   |      | Q4                   |      | Q5                   |      |
|-------------------------------------|----------------------|------|----------------------|------|----------------------|------|----------------------|------|----------------------|------|
|                                     | PM (95% CrI)         | pp   | PM (95% CrI)         | pp   | PM (95% CrI)         | pp   | PM (95% CrI)         | pp   | PM (95% CrI)         | pp   |
| Time effect (years)                 | 1.07 ( 0.99 ; 1.16 ) | 0.96 | 1.08 ( 1.00 ; 1.17 ) | 0.97 | 1.01 ( 0.93 ; 1.09 ) | 0.58 | 0.99 ( 0.90 ; 1.09 ) | 0.54 | 1.00 ( 0.91 ; 1.10 ) | 0.53 |
| Pump-exposure status ref= Unexposed |                      |      |                      |      |                      |      |                      |      |                      |      |
| Exposed                             | 0.68 ( 0.41 ; 1.16 ) | 0.93 | 0.50 ( 0.30 ; 0.84 ) | 0.99 | 0.52 ( 0.30 ; 0.88 ) | 0.99 | 0.61 ( 0.33 ; 1.17 ) | 0.93 | 0.67 ( 0.35 ; 1.27 ) | 0.89 |

ESM Table 19: Crude DKA event-rates and associated 95% Confidence Intervals by CSII exposure status - Stratified by prior FM/CGM usage - (E denotes the number of events observed and PY the number of person-years observed) -

| Pump Exposure status | E PY  Crude event rate (95% CI)       |                                     |
|----------------------|---------------------------------------|-------------------------------------|
|                      | No prior FM/CGM usage                 | Prior FM/CGM usage                  |
| No exposure          | 1082   16079.5   67.3 ( 63.3 ; 71.4 ) | 105   1402.7   74.9 ( 61.2 ; 90.6 ) |
| Exposed              | 820   16407.3   50.0 ( 46.6 ; 53.5 )  | E<10  270.1                         |

ESM Table 20: Estimated Rate Ratios of DKA admissions for CSII-exposed person-time vs pre-package person-time and for pre-package trend from models adjusted for age, diabetes duration, and HbA<sub>1c</sub> at baseline - stratified by prior FM/CGM usage -Posterior mean (95% Credible Interval) and posterior probability of the direction of the effect (pp)

| CSII Exposure status | No Prior FM/CGM use  |      | Prior FM/CGM use |    |
|----------------------|----------------------|------|------------------|----|
|                      | PM (95% CrI)         | pp   | PM (95% CrI)     | pp |
| Time effect (years)  | 1.03 ( 0.99 ; 1.07 ) | 0.94 | Low sample size  | -  |
| Pump-exposure status |                      |      | -                | -  |
| ref= Unexposed       |                      |      | -                | -  |
| Exposed              | 0.63 ( 0.49 ; 0.80 ) | 1.00 | -                | -  |

ESM Table 21: Estimated Rate Ratios of SHH admissions for CSII-exposed person-time vs pre-package person-time and for pre-package trend from models adjusted for age, sex, diabetes duration, and HbA<sub>1c</sub> at baseline - Posterior mean (95% Credible Interval) and posterior probability of the direction of the effect (pp)-

| Variable             | Posterior mean (95% Credible Interval) | pp   |
|----------------------|----------------------------------------|------|
| Time effect (years)  | 1.01 ( 0.95 ; 1.07 )                   | 0.65 |
| Pump-exposure status |                                        |      |
| ref= Unexposed       |                                        |      |
| Exposed              | 0.67 ( 0.45 ; 1.01 )                   | 0.97 |

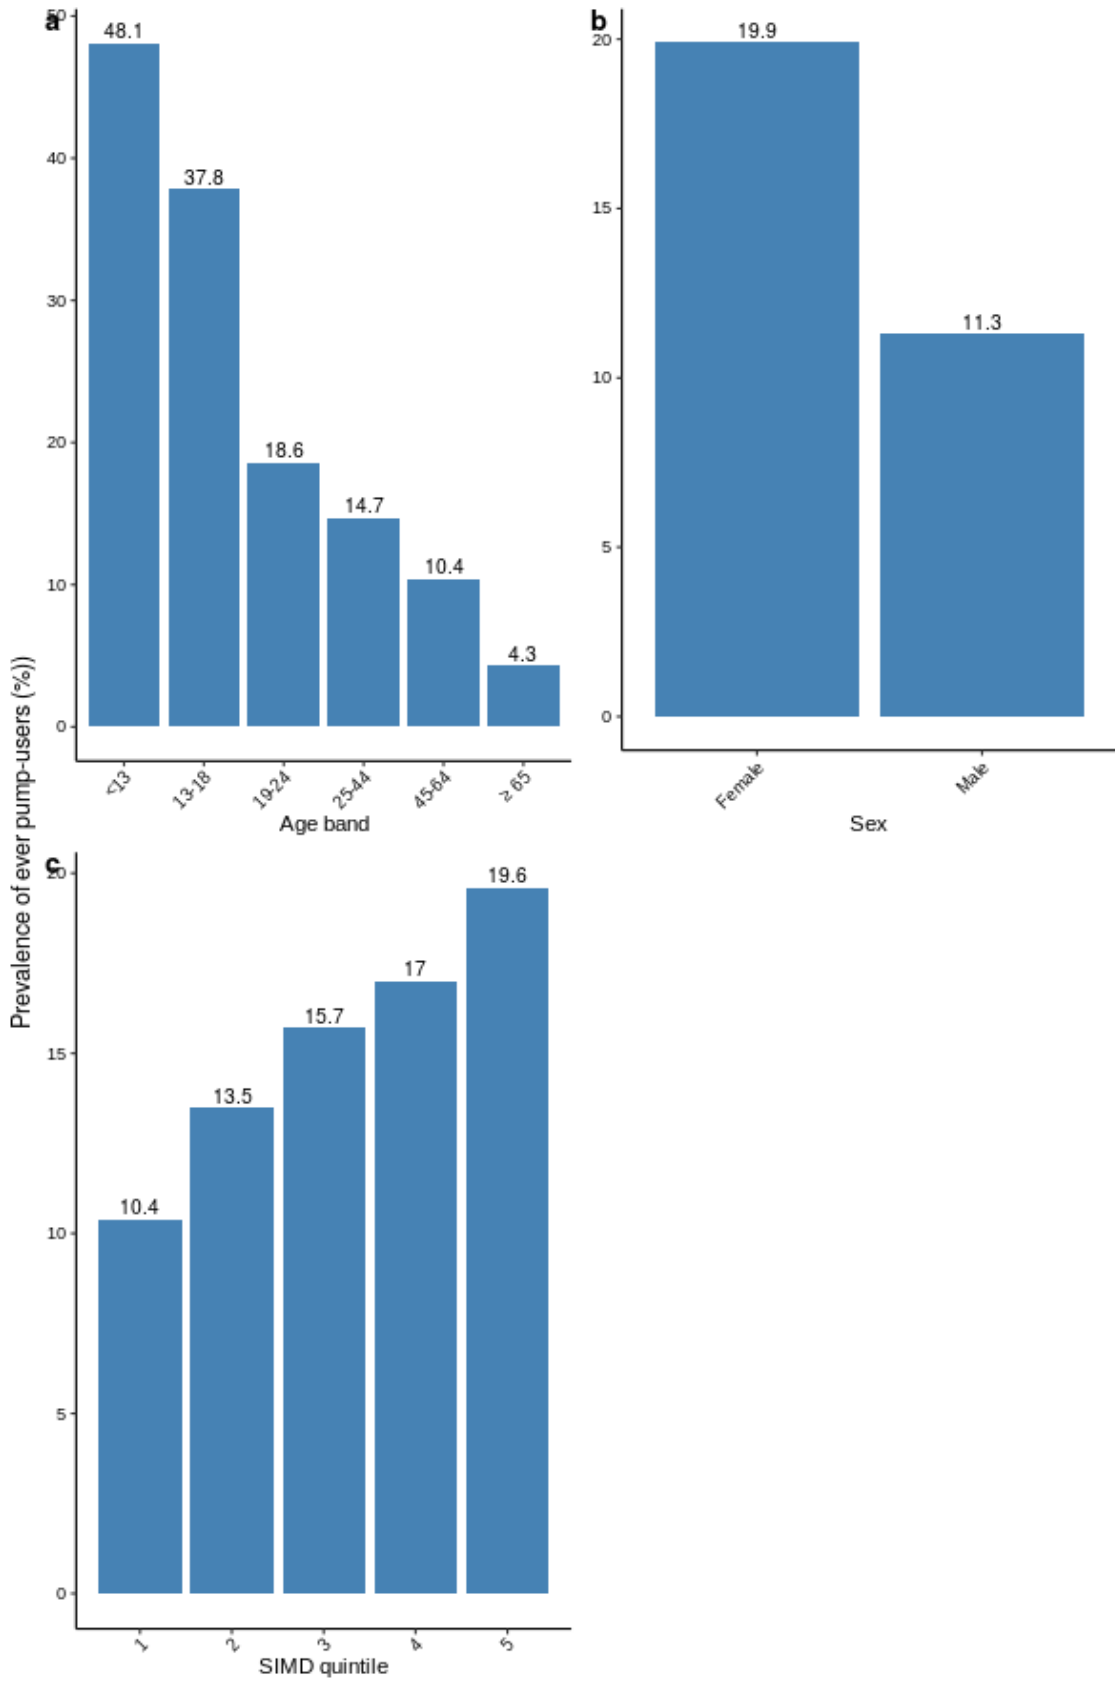

ESM Fig. 1: Current crude prevalence of CSII-usage, stratified by age band at CSII initiation (a), sex (b) and SIMD quintile (c)

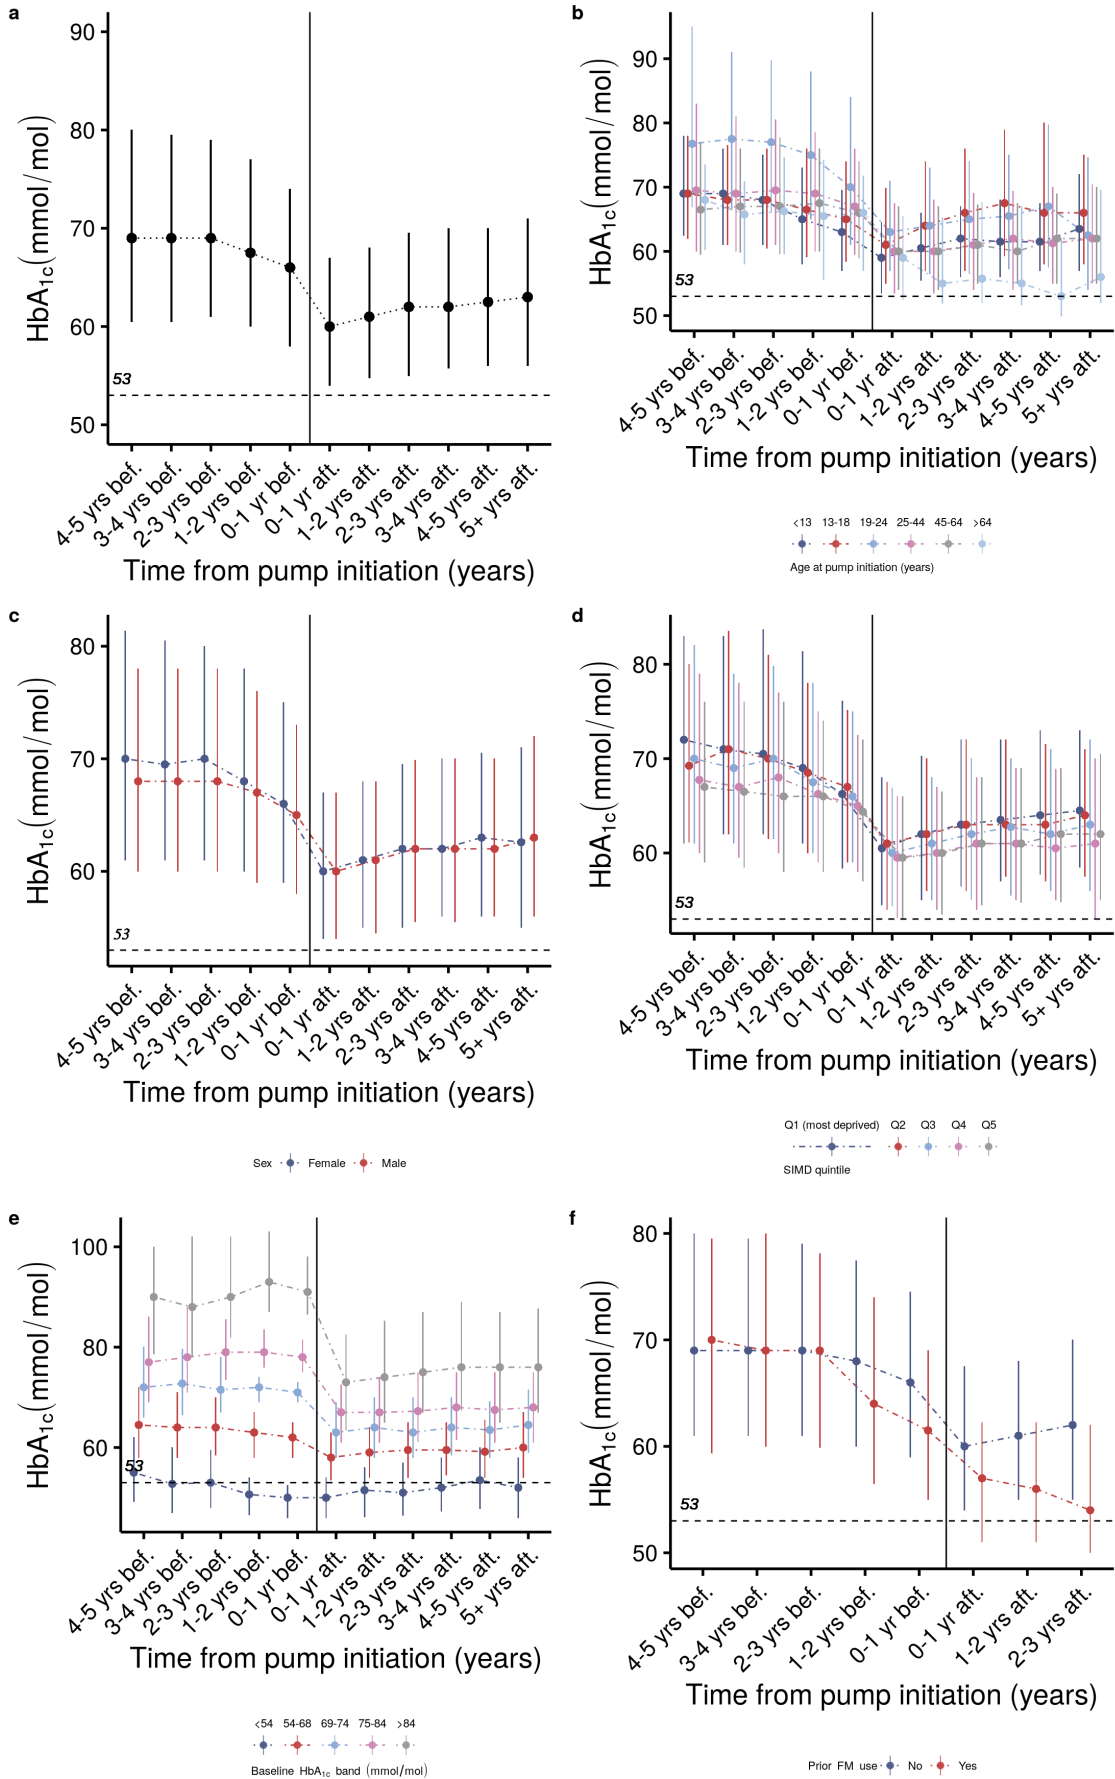

ESM Fig. 2: HbA<sub>1c</sub> levels (mmol/mol) over time from CSII initiation (years) among CSII users, overall (a) and stratified by age band at CSII initiation (b), sex (c), SIMD quintile (d), baseline HbA<sub>1c</sub> band (e), prior FM/CGM use (f)

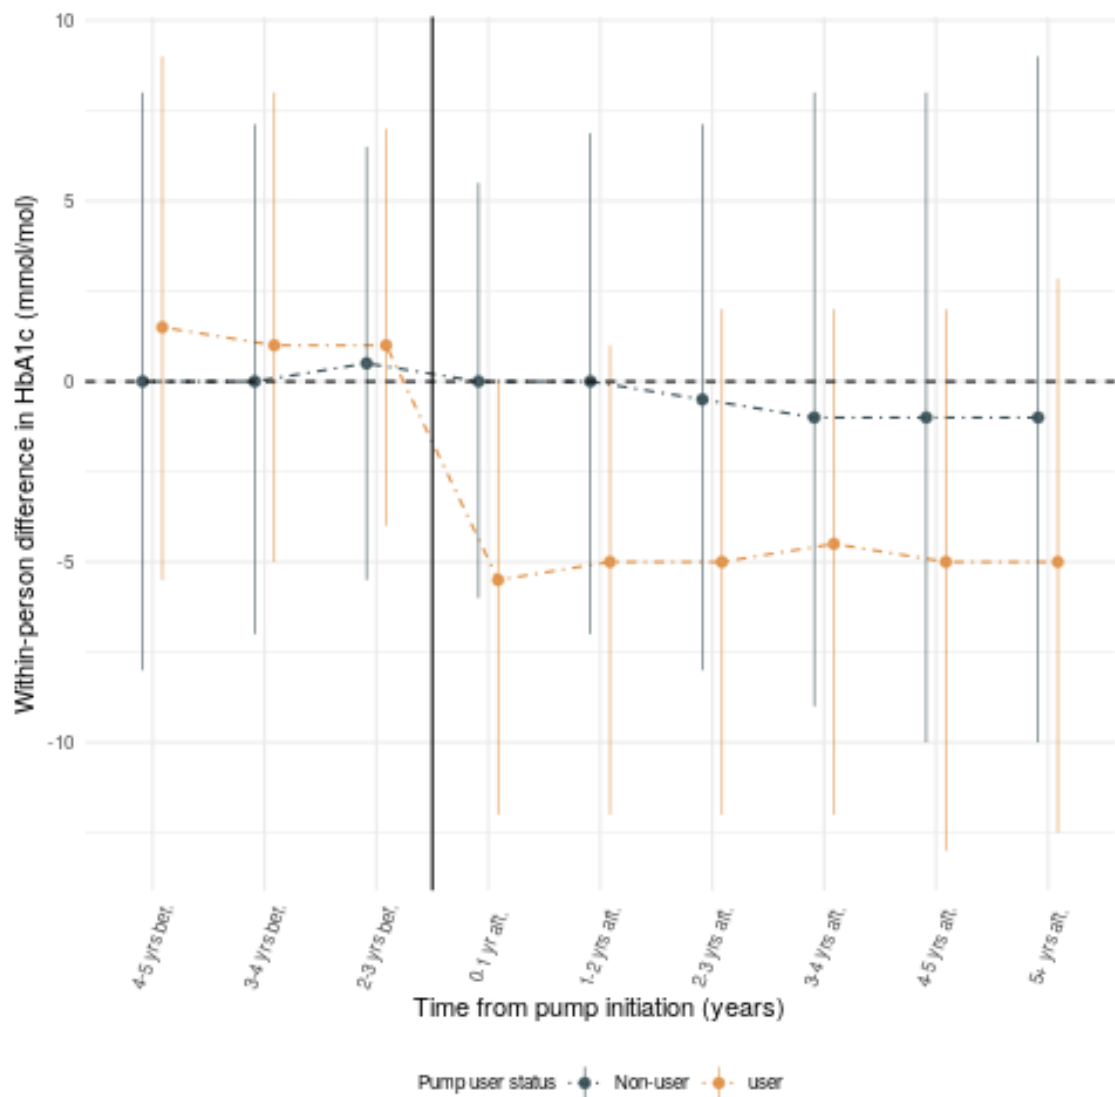

ESM Fig. 3: CSII users vs matched non-users- within-person change from baseline in HbA<sub>1c</sub> (mmol/mol) over time from CSII initiation date (years)

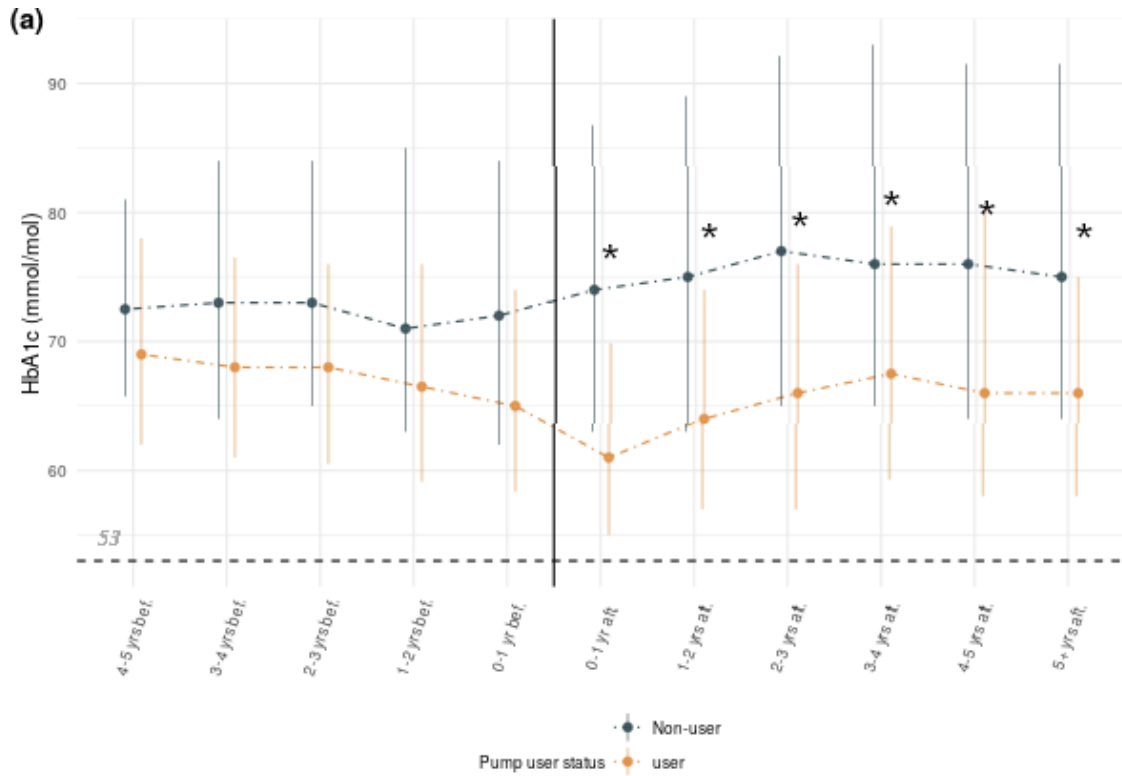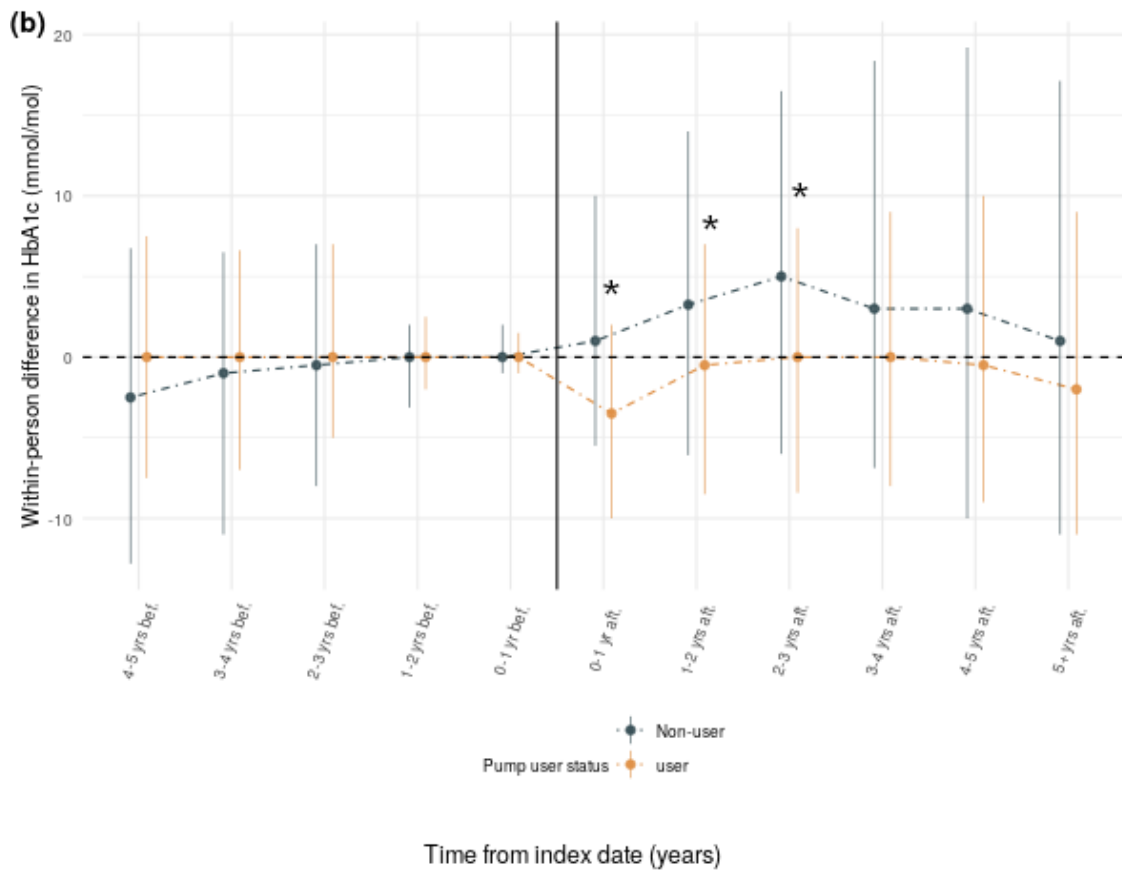

ESM Fig. 4: Adolescents subgroup (13-18y.)- CSII adolescent users versus matched non-users- HbA<sub>1c</sub> levels (a) and change from baseline in HbA<sub>1c</sub> (b) (mmol/mol) over time from CSII initiation date (years) - Significance of one-sided signed-rank Wilcoxon test p adjusted for multiple comparisons, of paired user vs matched non-users difference in post-index years denoted by (\*)

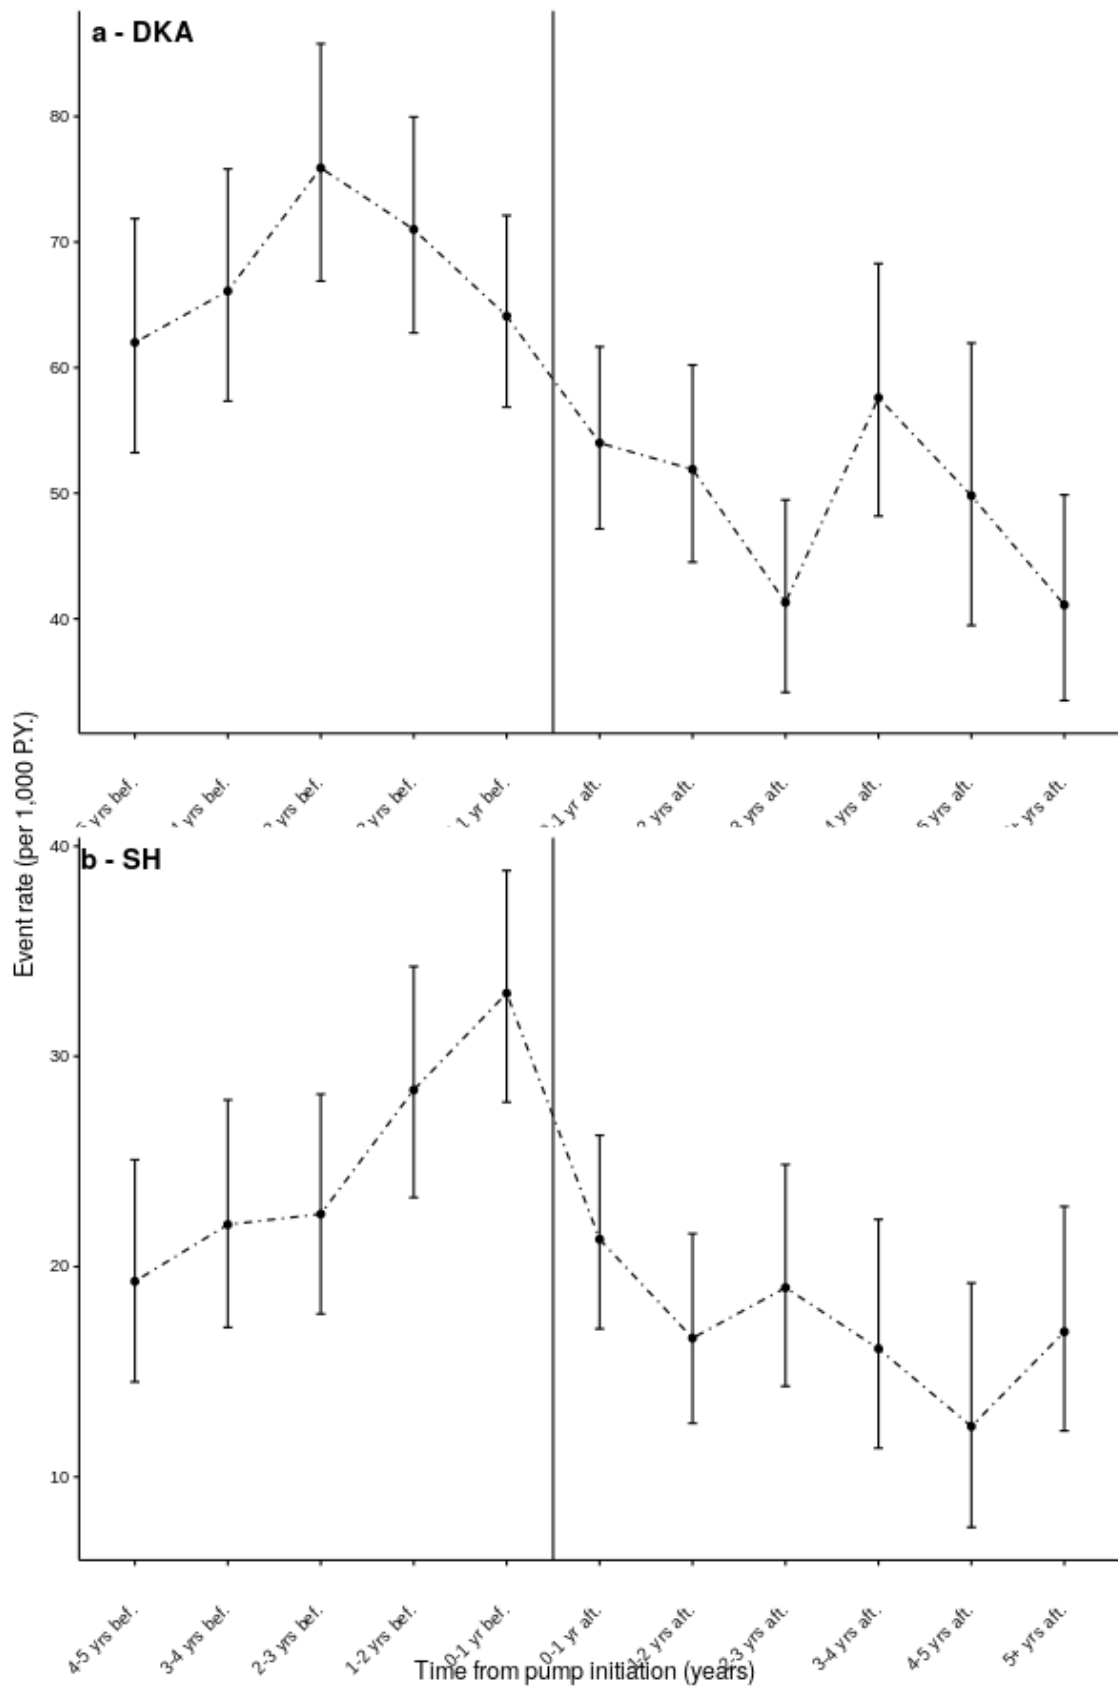

ESM Fig. 5: Crude event-rates and associated 95% Confidence Intervals, by time from CSII initiation (years) - DKA (a) and SHH (b)



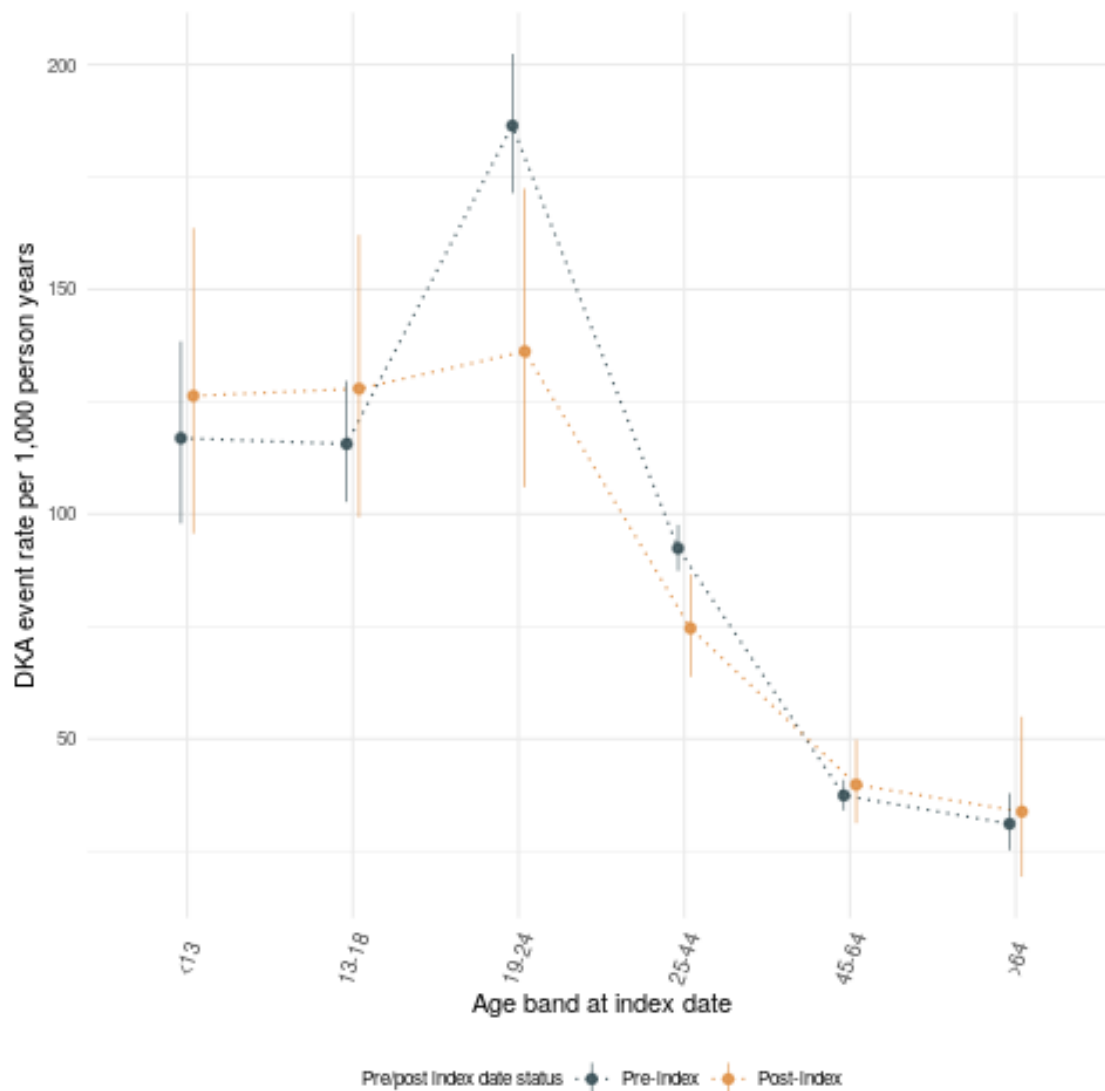

ESM Fig. 6: DKA crude event rates and 95% CI in non-user control group - pre vs post index date- by age band at index date
